# Supplementary material for: Essential role of eIF5-mimic protein in animal development is linked to control of ATF4 expression
Source: PubMed Central journal article supplement (PMC4176352; doi:10.1093/nar/gku670), 2014-08-21
Supplement: supp_gku670_nar-00820-v-2014-File010.pdf [file supp_gku670_nar-00820-v-2014-File010.pdf]

# Hiraishi\_Fig. S1

## A

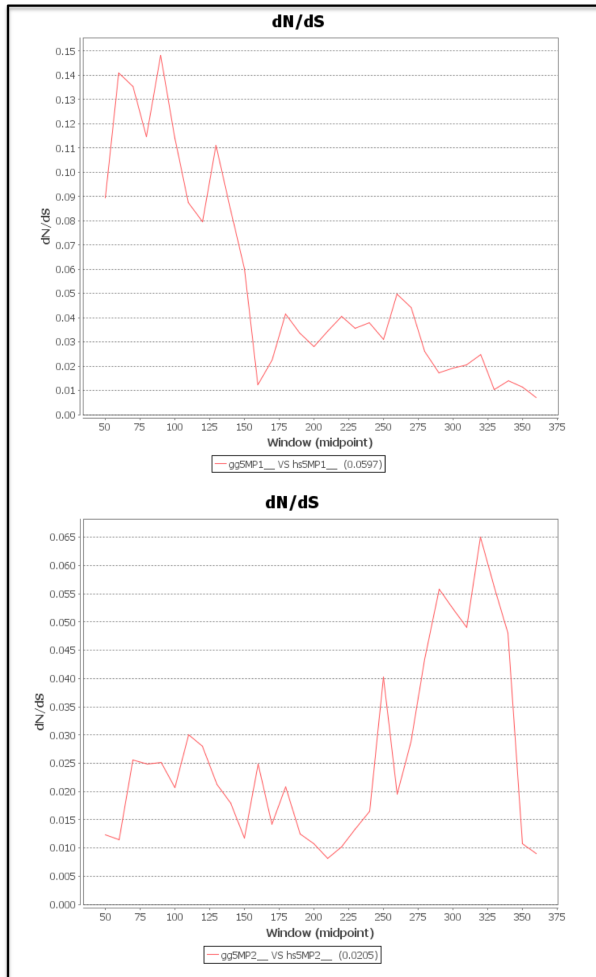

## B

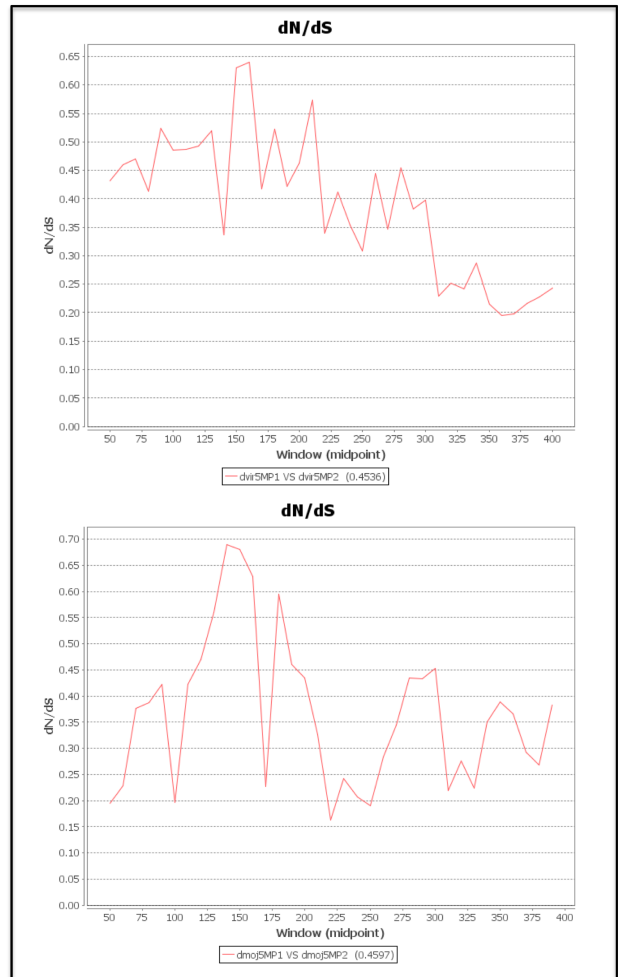

# Hiraishi\_Fig. S2

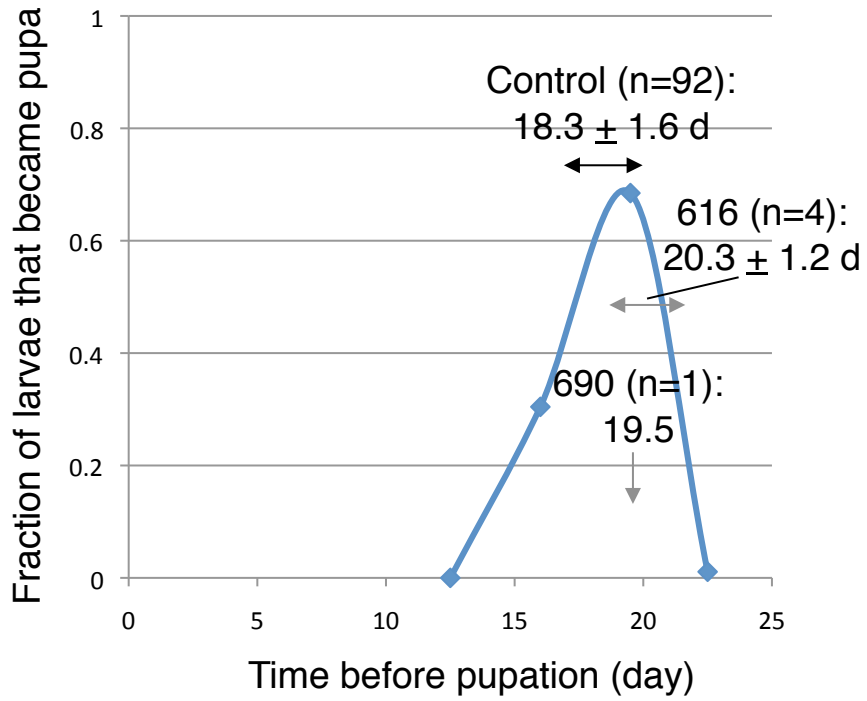

# Hiraishi\_Fig. S3

**A** Larvae that hatched from the first egg collection (3 days after dsRNA injection)

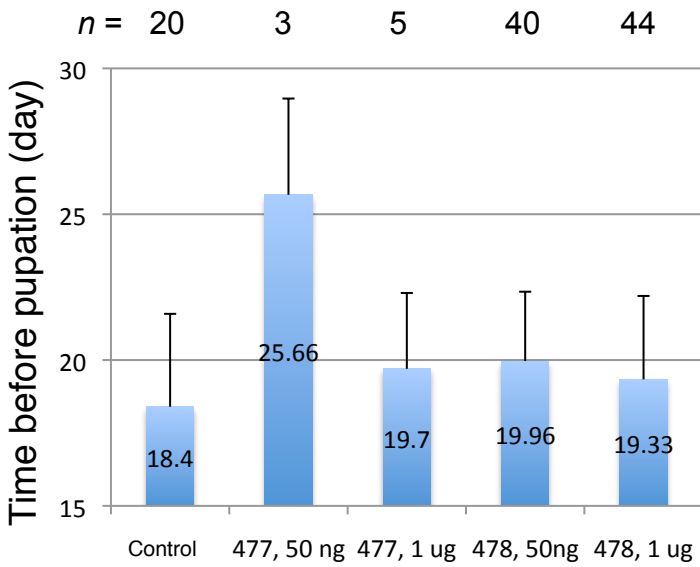

**B** Larvae that hatched from the *first two* egg collections (3 and 6 days after dsRNA injection)

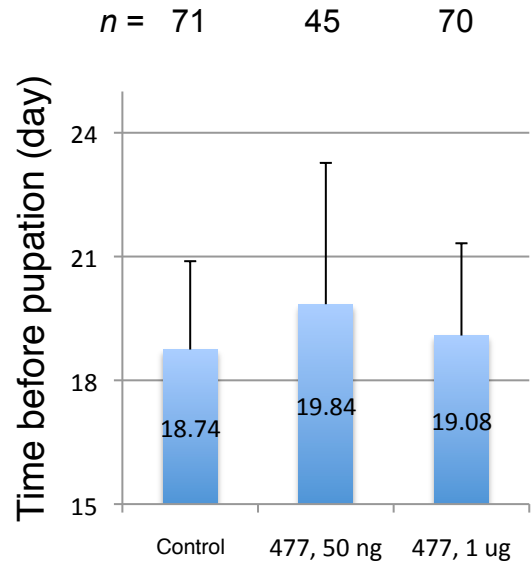

$p = 0.03$  ( $n = 4$ )

| <b>C</b> # of Larvae    | Pupated between 12 and 25 days | Pupated between 27 and 35 days | Lived for >27 days but died before 38 days |
|-------------------------|--------------------------------|--------------------------------|--------------------------------------------|
| 1. Control              | 128 (100%)                     | 0 (0 %)                        | 0                                          |
| 2. dsRNA-477, 50 ng     | 142 (96.6%)                    | 5 (3.4%)                       | 0                                          |
| 3. dsRNA-477, 1 $\mu$ g | 134 (98.5%)                    | 2 (1.5%)                       | 1                                          |
| 4. dsRNA-478, 50 ng     | 166 (100%)                     | 0 (0%)                         | 0                                          |
| 5. dsRNA-478, 1 $\mu$ g | 165 (98.8%)                    | 1 (0.6%)                       | 5                                          |
